# Supplementary material for: Effect of enzyme immobilization andin vitrodigestion on the immune-reactivity and sequence of IgE epitopes in egg white proteins
Source: Royal Society of Chemistry journal article supplement (doi:10.1039/d0fo00938e), 2020-01-01
Supplement: d0fo00938e1.pdf [file d0fo00938e1.pdf]

The optimum conditions for egg white protein hydrolysis by free Neutrased (FN), immobilized Neutrased (IN), free Thermolysin (FT) and immobilized Thermolysin (IT) that was previously reported by our group in an article titled “Effect of Neutrased and Thermolysin immobilization on enzyme properties and the anti-diabetic activities of peptides derived from *in vitro* digestion of egg white protein hydrolysates” submitted to Applied Food Biotechnology.

| Enzyme | pH  | Temperature<br>(°C) | Time<br>(h) | Enzyme concentration<br>(w/w) |
|--------|-----|---------------------|-------------|-------------------------------|
| FN     | 7.9 | 43.2                | 2.7         | 0.05                          |
| IN     | 8.0 | 47.2                | 2.8         | 0.05                          |
| FT     | 8.0 | 76.8                | 3.0         | 0.05                          |
| IT     | 9.0 | 80.0                | 3.0         | 0.05                          |
